# Supplementary material for: CBFB-MYH11 hypomethylation signature and PBX3 differential methylation revealed by targeted bisulfite sequencing in patients with acute myeloid leukemia
Source: J Hematol Oncol. 2014 Sep 30;7:66. doi: 10.1186/s13045-014-0066-4 (PMC4197269; doi:10.1186/s13045-014-0066-4)
Supplement: Additional file 8: Table S5. — 454 bisulfite primers and annealing temperatures Primer sequences and annealing temperatures used to amplify regions of interest. [file 13045_2014_66_MOESM8_ESM.xlsx]

## Sheet: List1
Table S5: 454 bisulfite primers and annealing temperatures used to amplify regions of interest
name	1st PCR - loci specific part - forward	1st PCR - loci specific part - reverse	Ta (annealling temperature) (°C)
MN1_region1	GGTATAGGYGGTGTGAATT	ACCCCATACTACCCAACC	60
MN1_region2	AGAAGTTTGGAGAATGTTGATGT	CCCCACATCCTACCATATCTTA	60
SPARC_region1	TGGAGTTTTTTTTTTTAAGGAA	AAAAACCCAAACATCAAATATC	60
SPARC_region2	TTTTGTAAATTTGTAAGGGAAGA	ACCTTTCCCTTCTATAATTACACC	60
ST18	GGGTTTTATTATGTTGGTTAGGTT	TTAATAAATTTTCCCCCAAAAA	58
DHRS3	TTGGGGTATTTTTAAATGATTG	TATCACTACCTTTTAAAAAACAATCAC	60
PBX3	TAGTTGAGAGTTGTTGTTTTTGG	TCCTAACATCCAATCTCCC	60
